# Supplementary material for: Layered perovskite nanosheets bearing fluoroalkoxy groups: their preparation and application in epoxy-based hybrids
Source: Royal Society of Chemistry journal article supplement (doi:10.1039/c4ra01777c), 2014-01-01
Supplement: c4ra01777c1.pdf [file c4ra01777c1.pdf]

Electronic supplementary information:

Layered perovskite nanosheets bearing fluoroalkoxy groups:  
their preparation and application in epoxy-based hybrids

Yuta Asai<sup>a</sup>, Yusuke Ariake<sup>a</sup>, Hitomi Saito<sup>a</sup>, Naokazu Idota<sup>b</sup>, Kimihiro  
Matsukawa<sup>c</sup>, Takashi Nishino<sup>d</sup> and Yoshiyuki Sugahara<sup>\*a,b</sup>

<sup>a</sup> *Department of Applied Chemistry, School of Advanced Science and Engineering, Waseda  
University, 3-4-1 Okubo, Shinjuku-ku, Tokyo 169-8555, Japan*

<sup>b</sup> *Kagami Memorial Research Institute for Materials Science and Technology, Waseda  
University, 2-8-26 Nishiwaseda, Shinjuku-ku, Tokyo 169-0051, Japan*

<sup>c</sup> *Osaka Municipal Technical Research Institute, 1-6-50 Morinomiya, Joto-ku,  
Osaka 536-8553, Japan*

<sup>d</sup> *Department of Chemical Science and Engineering, Graduate School of Engineering, Kobe  
University, 1-1 Rokkodaicho, Nada-ku, Kobe 657-8501, Japan*

\* Tel: +81-3-5286-3204, Fax: +81-3-5286-3204, E-mail: ys6546@waseda.jp

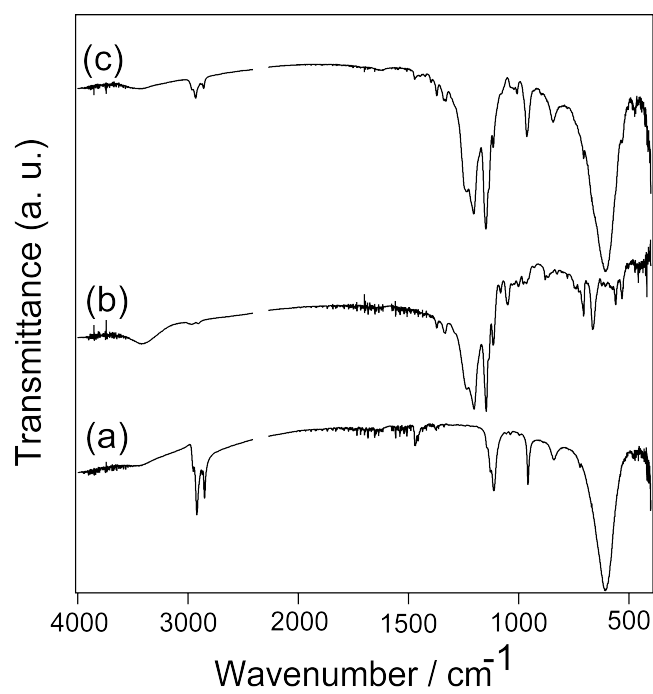

Fig. S1 IR spectra of (a) C10\_HLaNb (b) C10FOH and (b) C10F\_HLaNb.

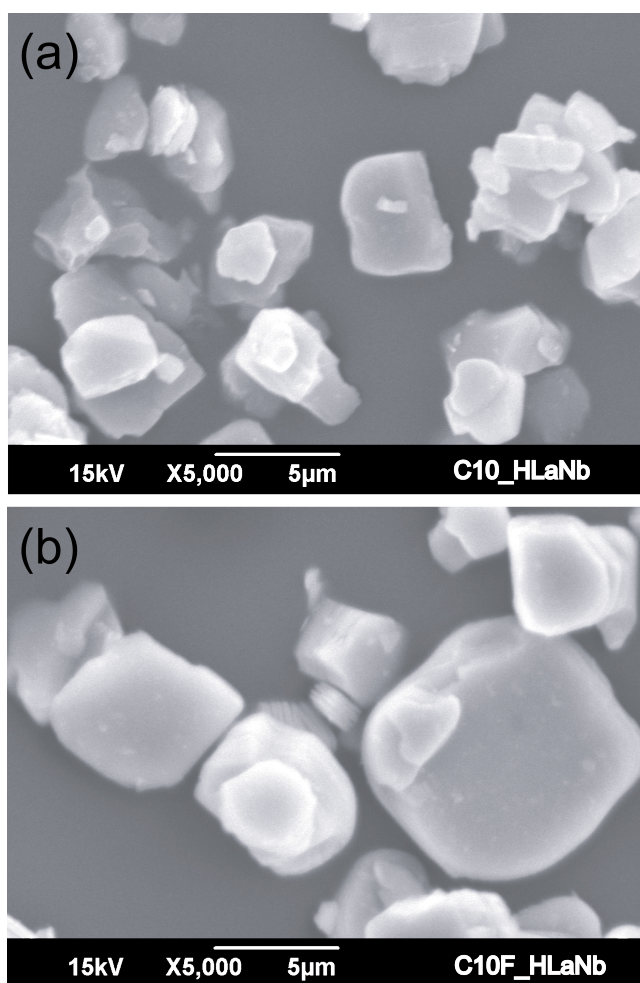

Fig. S2 SEM images of (a) C10\_HLaNb and (b) C10F\_HLaNb.

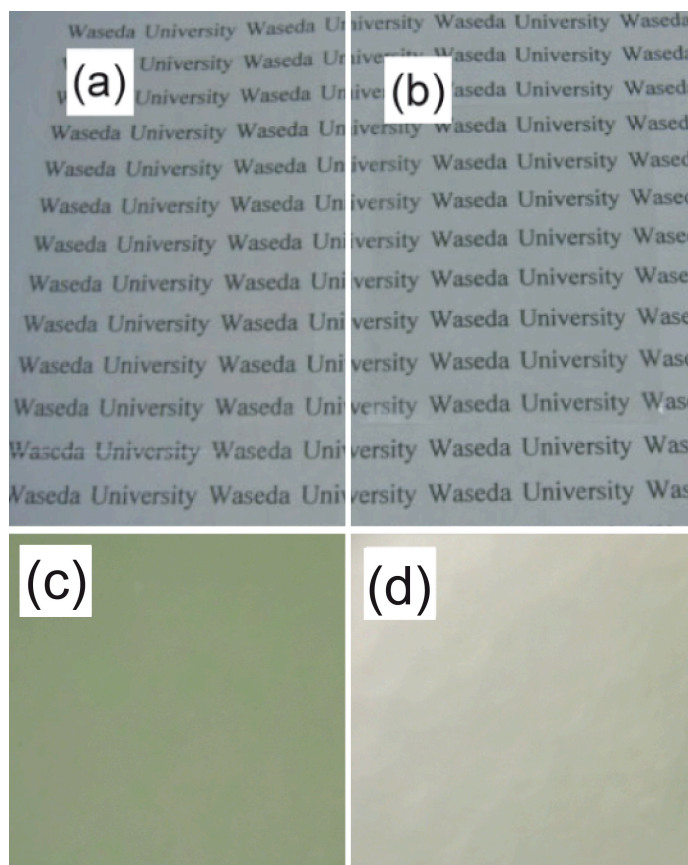

Fig. S3 Photographs of (a) neat epoxy (b) C10F\_HLaNb/epoxy\_5, and optical micrographs of (c) neat epoxy (d) C10F\_HLaNb/epoxy\_5.

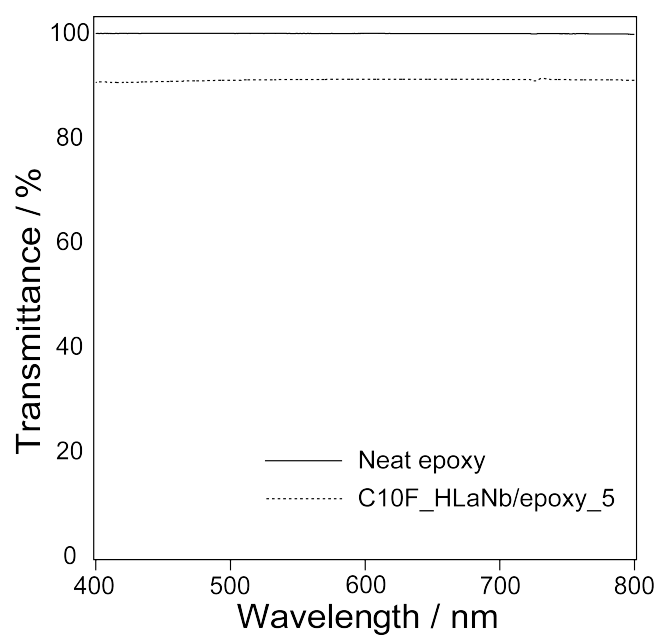

Fig. S4 UV-Vis spectra of neat epoxy and C10F\_HLaNb/epoxy\_5.
